# Supplementary material for: RGC-32 Regulates Generation of Reactive Astrocytes in Experimental Autoimmune Encephalomyelitis
Source: PubMed Central journal article supplement (PMC7868332; doi:10.3389/fimmu.2020.608294), 2021-01-25
Supplement: DataSheet_1.pdf [file DataSheet_1.pdf]

## *Supplementary Material*

### 1. Tables

| <b>Supplementary table   Mouse primers used for Real Time PCR</b> |                                                                            |
|-------------------------------------------------------------------|----------------------------------------------------------------------------|
| <b>Gene symbol</b>                                                | <b>Primers sequence</b>                                                    |
| CTGF                                                              | For: 5'- CCTGCCCTAGCTGCCTAC -3'<br>Rev: 5'- GCACTTTTTGCCCTTCTTAA -3'       |
| IGF1                                                              | For: 5'- GCTGCTGAAGCCATTCATTTAG -3'<br>Rev: 5'- CGTGGGAAGAGGTGAAGATAAG -3' |
| IGFBP2                                                            | For: 5'- GGTGCCAAACACCTCAGTCT -3'<br>Rev: 5'- GGAGATCCGCTCCAGGAC -3'       |
| IGFBP3                                                            | For: 5'- GCAGCCTAAGCACCTACC -3'<br>Rev: 5'- GCTTAGACTGCCAGGAGAAGTTC -3'    |
| MMP2                                                              | For: 5'- GTTCAACGGTCGGGAATACA -3'<br>Rev: 5'- GCCATACTTGCCATCCTTCT -3'     |
| MMP9                                                              | For: 5'- CTGGAACTCACACGACATCTT -3'<br>Rev: 5'- TCCACCTTGTTACCTCATTT -3'    |
| 18S                                                               | For: 5'- GTAACCCGTTGAACCCATT -3'<br>Rev: 5'- CCATCCAATCGGTAGTAGCG -3'      |

## 2. Figures

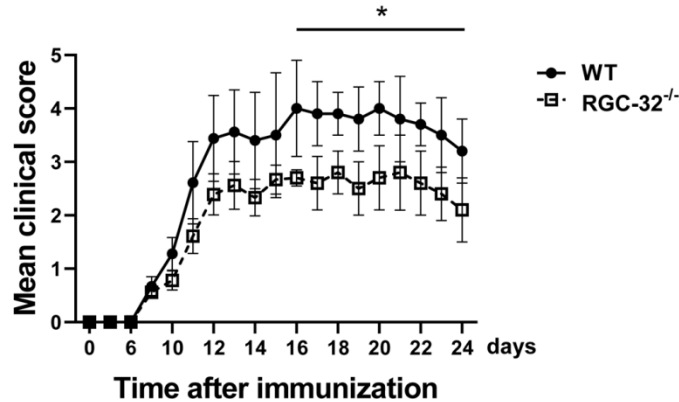

### Supplementary Figure 1. Lack of RGC-32 attenuates the clinical course of EAE

WT and RGC-32 KO mice were immunized with MOG<sub>35-55</sub> and then clinical scores were determined during EAE as described in Materials and Methods. Data are expressed as mean  $\pm$  SEM of clinical EAE scores and are representative of three independent experiments (6 mice for each group/ experiment). \* =  $p < 0.05$ .

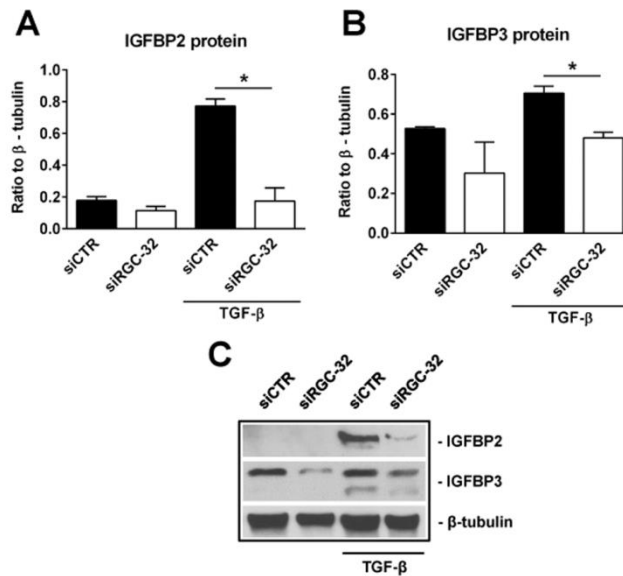

### Supplementary Figure 2. RGC-32 silencing affects the expression of IGFBP2 and IGFBP3 proteins in rat astrocytes

Cultured rat astrocytes were transfected with siRGC-32 or siCTR using Lipofectamine 3000, then stimulated with TGF- $\beta$  (10 ng/ml) for 24 h. RGC-32 silencing significantly reduced the protein expression of IGFBP2 (**A**) and IGFBP3 (**B**) when compared with that of siCTR. The protein expression was normalized to  $\beta$ -tubulin. A representative blot for each protein is shown in **C**. Results are expressed as mean  $\pm$  SEM ( $n=3$ ). \* =  $p < 0.05$ .

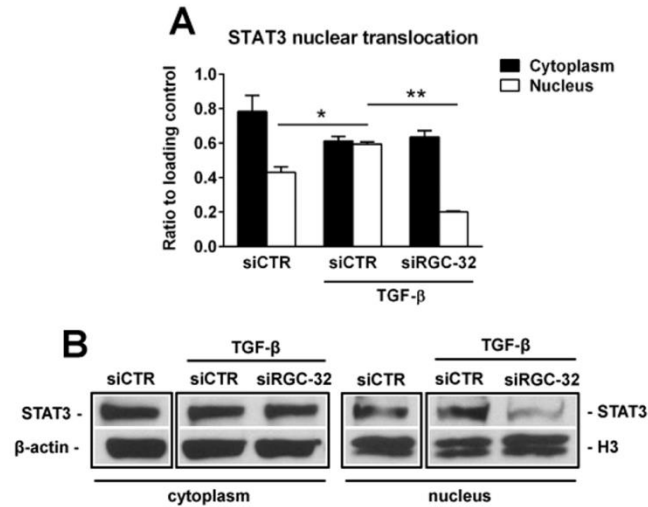

**Supplementary Figure 3. STAT3 nuclear translocation depends on RGC-32**

Primary rat astrocytes were transfected with siRGC-32 or siCTR using Lipofectamine 3000, then stimulated with TGF- $\beta$  (10 ng/ml) for 4 h. Cell lysates were separated into cytoplasmic and nuclear fractions and then analyzed by Western blotting. TGF- $\beta$  treatment resulted in a significant increase in STAT3 nuclear translocation, and this process was greatly reduced when RGC-32 was silenced. The results are expressed as ratios to  $\beta$ -actin for the cytoplasmic fraction and to histone H3 for the nuclear fraction. Representative blots are shown in **B**. Data in **A** are shown as mean  $\pm$  SEM (n=3). \* = p<0.05; \*\* = p<0.01.
